# Supplementary material
Source: Royal Society of Chemistry journal article supplement (doi:10.1039/d5ay02031j)
Supplement: d5ay02031j1.pdf [file d5ay02031j1.pdf]

Supplement Table 1 Herbal Composition of LGF

| No. | Latin Name                                                      | Chinese Name | Place of origin | Ratio |
|-----|-----------------------------------------------------------------|--------------|-----------------|-------|
| 1   | <i>Aconiti radix cocta</i>                                      | Zhichuanwu   | Sichuan, China  | 40g   |
| 2   | <i>Aconiti kusnezoffii radix cocta</i>                          | Zhicaowu     | Hebei, China    | 40g   |
| 3   | <i>Clematis chinensis Osbeck</i>                                | Weilingxian  | Liaoning, China | 40g   |
| 4   | <i>Gentiana macrophylla Pall.</i>                               | Qinjiao      | Sichuan, China  | 20g   |
| 5   | <i>Eucommia ulmoides Oliv.</i>                                  | Yanduzhong   | Sichuan, China  | 40g   |
| 6   | <i>Achyranthes bidentata Blume</i>                              | Niuxi        | Henan, China    | 10g   |
| 7   | <i>Astragalus mongholicus Bunge</i>                             | Huangqi      | Gansu, China    | 40g   |
| 8   | <i>Smilax glabra Roxb.</i>                                      | Tufuling     | Sichuan, China  | 40g   |
| 9   | <i>Coix lacryma-jobi L.</i>                                     | Yiyiren      | Guizhou, China  | 40g   |
| 10  | <i>Cynanchum wilfordii (Maxim.)<br/>Hook.f.</i>                 | Geshanxiao   | Sichuan, China  | 10g   |
| 11  | <i>Aster indicus L.</i>                                         | Malancao     | Sichuan, China  | 10g   |
| 12  | <i>Houttuynia cordata Thunb.</i>                                | Yuxingcao    | Sichuan, China  | 10g   |
| 13  | <i>Sargentodoxa cuneata (Oliv.)<br/>Rehder &amp; E.H.Wilson</i> | Daxueteng    | Sichuan, China  | 40g   |
| 14  | <i>Dioscorea septemloba Thunb.</i>                              | Mianbixie    | Sichuan, China  | 20g   |
