# Supplementary material
Source: Royal Society of Chemistry journal article supplement (doi:10.1039/d5ay02031j)
Supplement: d5ay02031j2.pdf [file d5ay02031j2.pdf]

Table 1 Identification of chemical constituents of LGF

| Peak<br>(No.) | $t_R$ /min | Molecular<br>formula                                          | Ion mode              | Found<br>mass ( $m/z$ ) | Error / $\times 10^{-6}$ | Fragment ( $m/z$ )                      | Compound                                                          | Attribution       |
|---------------|------------|---------------------------------------------------------------|-----------------------|-------------------------|--------------------------|-----------------------------------------|-------------------------------------------------------------------|-------------------|
| P1            | 1.44       | C <sub>21</sub> H <sub>22</sub> O <sub>8</sub>                | [M+HCOO] <sup>-</sup> | 447.1333                | 8.0                      | 225.0511                                | Nobiletin                                                         | g,f               |
| P2            | 1.81       | C <sub>6</sub> H <sub>8</sub> O <sub>7</sub>                  | [M-H] <sup>-</sup>    | 191.0187                | -5.4                     | 154.9983,111.0085                       | Isocitric acid                                                    | c                 |
| P3            | 1.87       | C <sub>17</sub> H <sub>28</sub> O <sub>14</sub>               | [M-H] <sup>-</sup>    | 455.1418                | 2.7                      | 131.0345                                | 3-Deoxy-D-ribo- $\gamma$ -lactone-<br>3-O-gentiobioside           | f                 |
| P4            | 1.88       | C <sub>7</sub> H <sub>11</sub> NO <sub>5</sub>                | [M-H] <sup>-</sup>    | 188.0554                | -5.5                     | 144.0666,102.0565                       | N-acetyl-d-glutamic acid                                          | h                 |
| P5            | 2.10       | C <sub>14</sub> H <sub>20</sub> O <sub>9</sub>                | [M-H] <sup>-</sup>    | 331.1030                | -1.5                     | 153.0192                                | Kaoburaside                                                       | c                 |
| P6            | 2.17       | C <sub>17</sub> H <sub>24</sub> O <sub>10</sub>               | [M+HCOO] <sup>-</sup> | 433.1357                | 1.4                      | 341.1074,161.0440                       | Swertiajaposide A                                                 | i                 |
| P7            | 2.30       | C <sub>22</sub> H <sub>32</sub> O <sub>14</sub>               | [M+HCOO] <sup>-</sup> | 565.1761                | -2.2                     | 341.1064,179.0532                       | Swertiapunimarin                                                  | i                 |
| P8            | 2.31       | C <sub>10</sub> H <sub>13</sub> N <sub>5</sub> O <sub>5</sub> | [M-H] <sup>-</sup>    | 282.0831                | -4.6                     | 150.0408,133.0144                       | Guanosine                                                         | d,h               |
| P9            | 2.42       | C <sub>16</sub> H <sub>22</sub> O <sub>9</sub>                | [M+H] <sup>+</sup>    | 359.1316                | -5.8                     | 299.1103,271.1150                       | Sweroside                                                         | i                 |
| P10           | 2.66       | C <sub>7</sub> H <sub>12</sub> O <sub>6</sub>                 | [M-H] <sup>-</sup>    | 191.0552                | -5.0                     | 111.0081                                | Quinic acid                                                       | b,l,c,m,j,k,<br>h |
| P11           | 2.88       | C <sub>14</sub> H <sub>20</sub> O <sub>7</sub>                | [M+HCOO] <sup>-</sup> | 345.1176                | -4.4                     | 179.0330,137.0253                       | Salidroside                                                       | l                 |
| P12           | 2.96       | C <sub>17</sub> H <sub>26</sub> O <sub>11</sub>               | [M-H] <sup>-</sup>    | 405.1368                | -8.5                     | 179.0566,161.0437                       | Morrinoside                                                       | i                 |
| P13           | 3.43       | C <sub>13</sub> H <sub>24</sub> O <sub>9</sub>                | [M-H] <sup>-</sup>    | 323.1342                | -1.8                     | 179.0566,161.0437,143.0323              | Periplobiose                                                      | c                 |
| P14           | 3.72       | C <sub>14</sub> H <sub>18</sub> O <sub>9</sub>                | [M-H] <sup>-</sup>    | 329.0888                | 3.0                      | 167.0340,123.0446                       | Vanillic acid-4-O- $\beta$ -D-<br>glucopyranoside                 | l                 |
| P15           | 3.80       | C <sub>16</sub> H <sub>22</sub> O <sub>10</sub>               | [M-H] <sup>-</sup>    | 373.1140                | 0.0                      | 315.1066,153.0184                       | Swertiamarine                                                     | i                 |
| P16           | 3.93       | C <sub>16</sub> H <sub>24</sub> O <sub>10</sub>               | [M-H] <sup>-</sup>    | 375.1291                | -1.4                     | 213.0753,161.0441,151.0769              | Loganic acid                                                      | i                 |
| P17           | 4.30       | C <sub>9</sub> H <sub>10</sub> O <sub>5</sub>                 | [M-H] <sup>-</sup>    | 197.0437                | -9.3                     | 123.0445                                | Syringic acid                                                     | f,l,m,n,g         |
| P18           | 4.34       | C <sub>16</sub> H <sub>24</sub> O <sub>12</sub>               | [M+HCOO] <sup>-</sup> | 453.1259                | 2.0                      | 293.0877                                | 1,2-O-di-3-O-2-deoxy-D-<br>ribo- $\gamma$ -<br>lactonyl-glucoside | f                 |
| P19           | 4.68       | C <sub>16</sub> H <sub>24</sub> O <sub>10</sub>               | [M-H] <sup>-</sup>    | 375.1288                | -2.2                     | 213.0755                                | 8-Hydroxy-10-hydroxy-<br>swertiamarin                             | i                 |
| P20           | 4.85       | C <sub>9</sub> H <sub>11</sub> NO <sub>3</sub>                | [M+HCOO] <sup>-</sup> | 226.0713                | -3.4                     | 136.0764                                | L-Tyrosine                                                        | e                 |
| P21           | 5.14       | C <sub>15</sub> H <sub>22</sub> O <sub>10</sub>               | [M+HCOO] <sup>-</sup> | 407.1194                | -0.2                     | 181.0523,151.0403                       | Catalpol                                                          | c                 |
| P22           | 5.38       | C <sub>25</sub> H <sub>34</sub> O <sub>14</sub>               | [M-H] <sup>-</sup>    | 557.1835                | -7.3                     | 371.0964                                | Macrophylloside D                                                 | i                 |
| P23           | 5.60       | C <sub>19</sub> H <sub>28</sub> O <sub>12</sub>               | [M-H] <sup>-</sup>    | 447.1494                | -3.2                     | 191.0548                                | Cuneataside C                                                     | l                 |
| P24           | 6.15       | C <sub>15</sub> H <sub>20</sub> O <sub>10</sub>               | [M-H] <sup>-</sup>    | 359.0979                | -1.3                     | 197.0435,182.0207,166.9977,15<br>3.0547 | 4-Glucopyranosyloxy-3,5-<br>dimethoxy benzoic acid                | c                 |
| P25           | 6.21       | C <sub>18</sub> H <sub>22</sub> O <sub>11</sub>               | [M-H] <sup>-</sup>    | 413.1074                | -3.7                     | 251.0591                                | Asperuloside                                                      | c                 |
| P26           | 6.34       | C <sub>14</sub> H <sub>18</sub> O <sub>8</sub>                | [M-H] <sup>-</sup>    | 313.0929                | 0.0                      | 151.039                                 | Cyanoneside A                                                     | m                 |

|     |       |                                                 |                       |          |      |                                     |                                      |           |
|-----|-------|-------------------------------------------------|-----------------------|----------|------|-------------------------------------|--------------------------------------|-----------|
| P27 | 6.40  | C <sub>7</sub> H <sub>6</sub> O <sub>4</sub>    | [M-H] <sup>-</sup>    | 153.0184 | -5.9 | 109.0292                            | Gentisic acid                        | j         |
| P28 | 6.41  | C <sub>10</sub> H <sub>14</sub> O <sub>5</sub>  | [M-H] <sup>-</sup>    | 213.0765 | -1.6 | 183.0674                            | Guaiacylglycerol                     | c         |
| P29 | 6.44  | C <sub>15</sub> H <sub>22</sub> O <sub>9</sub>  | [M+HCOO] <sup>-</sup> | 391.1211 | -8.8 | 183.0674                            | Aucubin                              | c         |
| P30 | 6.58  | C <sub>9</sub> H <sub>8</sub> O <sub>3</sub>    | [M+HCOO] <sup>-</sup> | 209.0443 | -5.9 | 135.0443                            | P-coumaric acid                      | c,g       |
| P31 | 6.86  | C <sub>10</sub> H <sub>14</sub> O <sub>5</sub>  | [M-H] <sup>-</sup>    | 213.0750 | -8.7 | 139.0749                            | Borreriagenin                        | c         |
| P32 | 7.16  | C <sub>31</sub> H <sub>40</sub> O <sub>15</sub> | [M-H] <sup>-</sup>    | 651.2244 | -7.8 | 161.0467                            | Martynoside                          | j         |
| P33 | 7.19  | C <sub>7</sub> H <sub>12</sub> O <sub>5</sub>   | [M-H] <sup>-</sup>    | 175.0597 | -8.5 | 115.0394                            | Methyl 4-acetoxy-3-hydroxybutanoate  | h         |
| P34 | 7.21  | C <sub>16</sub> H <sub>22</sub> O <sub>10</sub> | [M-H] <sup>-</sup>    | 373.1128 | -3.2 | 193.0505,167.0726                   | Geniposidic acid                     | i,c       |
| P35 | 11.47 | C <sub>17</sub> H <sub>26</sub> O <sub>11</sub> | [M+HCOO] <sup>-</sup> | 451.1448 | -2.1 | 243.0854,155.0338                   | Shanzhiside methylester              | i         |
| P36 | 11.47 | C <sub>11</sub> H <sub>16</sub> O <sub>6</sub>  | [M-H] <sup>-</sup>    | 243.0861 | -5.5 | 195.0651                            | 5-Methoxy-guaiacylglycerol           | c         |
| P37 | 12.33 | C <sub>27</sub> H <sub>30</sub> O <sub>15</sub> | [M-H] <sup>-</sup>    | 593.1523 | 1.8  | 431.1008                            | Saponarin                            | i         |
| P38 | 12.34 | C <sub>16</sub> H <sub>18</sub> O <sub>9</sub>  | [M-H] <sup>-</sup>    | 353.0871 | -2.1 | 191.0538,179.0341,135.0445,127.0393 | Neochlorogenic acid                  | l,c,j,h   |
| P39 | 12.36 | C <sub>42</sub> H <sub>46</sub> O <sub>20</sub> | [M-H] <sup>-</sup>    | 869.2548 | 4.4  | 675.1924                            | Smilaside L                          | n         |
| P40 | 12.78 | C <sub>22</sub> H <sub>30</sub> O <sub>14</sub> | [M+HCOO] <sup>-</sup> | 563.1618 | 0.1  | 193.0496                            | 3'-O-β-D-glucopyranogentiopiecin     | i         |
| P41 | 13.24 | C <sub>16</sub> H <sub>18</sub> O <sub>9</sub>  | [M-H] <sup>-</sup>    | 353.0868 | -2.8 | 173.044                             | Cryptochlorogenic acid               | l,c,d,j,h |
| P42 | 13.55 | C <sub>17</sub> H <sub>24</sub> O <sub>11</sub> | [M+HCOO] <sup>-</sup> | 449.1299 | -0.4 | 127.0393                            | Qinjiaoside A                        | i         |
| P43 | 13.64 | C <sub>16</sub> H <sub>22</sub> O <sub>11</sub> | [M-H] <sup>-</sup>    | 389.1079 | -2.7 | 345.1179,209.0446,183.0653          | Secologanoside                       | i         |
| P44 | 13.72 | C <sub>22</sub> H <sub>30</sub> O <sub>14</sub> | [M+HCOO] <sup>-</sup> | 563.1619 | 0.3  | 341.1049,221.0650                   | 2'-O-beta-D-Glucosylgentiopicroside  | i         |
| P45 | 13.72 | C <sub>12</sub> H <sub>22</sub> O <sub>11</sub> | [M-H] <sup>-</sup>    | 341.1077 | -3.7 | 119.0349,113.0235                   | Sucrose                              | i,e,d     |
| P46 | 14.31 | C <sub>19</sub> H <sub>28</sub> O <sub>11</sub> | [M-H] <sup>-</sup>    | 431.1556 | -0.7 | 191.0544                            | Osmanthuside H                       | l         |
| P47 | 14.48 | C <sub>22</sub> H <sub>34</sub> O <sub>15</sub> | [M-H] <sup>-</sup>    | 537.1827 | 0.4  | 375.1316                            | Loganine glucoside                   | i         |
| P48 | 14.93 | C <sub>21</sub> H <sub>20</sub> O <sub>9</sub>  | [M-H] <sup>-</sup>    | 415.1030 | -1.1 | 271.0821,135.0441                   | Puerarin                             | f         |
| P49 | 15.20 | C <sub>16</sub> H <sub>20</sub> O <sub>9</sub>  | [M+HCOO] <sup>-</sup> | 401.1056 | -2.4 | 355.1036,179.0473,179.0519          | Gentiopicroside                      | i         |
| P50 | 15.32 | C <sub>15</sub> H <sub>14</sub> O <sub>6</sub>  | [M-H] <sup>-</sup>    | 289.0713 | -1.6 | 181.0523,151.0403                   | Catechin                             | n         |
| P51 | 15.33 | C <sub>30</sub> H <sub>26</sub> O <sub>12</sub> | [M-H] <sup>-</sup>    | 577.1363 | 1.9  | 289.0706                            | Procyanidin B                        | n         |
| P52 | 15.38 | C <sub>8</sub> H <sub>8</sub> O <sub>3</sub>    | [M-H] <sup>-</sup>    | 151.0400 | -0.7 | 107.0499                            | Vanillin                             | m,j,n,g   |
| P53 | 15.40 | C <sub>19</sub> H <sub>30</sub> O <sub>8</sub>  | [M+HCOO] <sup>-</sup> | 431.1916 | -1.6 | 223.0592,149.0263                   | Roseoside                            | h         |
| P54 | 15.45 | C <sub>16</sub> H <sub>18</sub> O <sub>8</sub>  | [M-H] <sup>-</sup>    | 337.0927 | -0.5 | 191.0556                            | 5-O-Coumaroylquinic acid             | c         |
| P55 | 15.73 | C <sub>24</sub> H <sub>39</sub> NO <sub>6</sub> | [M+H] <sup>+</sup>    | 438.2879 | 6.6  | 348.2155,105.0904                   | Bullatine B                          | a,b       |
| P56 | 15.74 | C <sub>32</sub> H <sub>42</sub> O <sub>16</sub> | [M+HCOO] <sup>-</sup> | 727.2450 | -0.7 | 327.1231                            | Pinoresinol Di-O-β-D-glucopyranoside | c         |
| P57 | 15.76 | C <sub>26</sub> H <sub>34</sub> O <sub>12</sub> | [M+HCOO] <sup>-</sup> | 583.2032 | -0.1 | 375.1349                            | Olivil 4''-O-glucoside               | c         |
| P58 | 15.85 | C <sub>8</sub> H <sub>14</sub> O <sub>5</sub>   | [M-H] <sup>-</sup>    | 189.0758 | -5.7 | 153.0548,129.0553,107.0501          | 3-Hydroxysuberic acid                | l         |

|     |       |                                                  |                       |          |      |                                     |                                                          |     |
|-----|-------|--------------------------------------------------|-----------------------|----------|------|-------------------------------------|----------------------------------------------------------|-----|
| P59 | 15.88 | C <sub>10</sub> H <sub>12</sub> O <sub>4</sub>   | [M-H] <sup>-</sup>    | 195.0654 | -4.6 | 147.0443                            | Methyl 3-(3,4-dihydroxyphenyl)propanoate                 | c   |
| P60 | 15.88 | C <sub>17</sub> H <sub>26</sub> O <sub>10</sub>  | [M+HCOO] <sup>-</sup> | 435.1489 | -4.3 | 185.0846,167.0723,149.0564,141.0519 | Reptoside                                                | c   |
| P61 | 15.97 | C <sub>16</sub> H <sub>16</sub> O <sub>8</sub>   | [M-H] <sup>-</sup>    | 335.0762 | -3.2 | 179.0338,135.0436                   | 5-O-Caffeoylshikimic Acid                                | n   |
| P62 | 16.01 | C <sub>15</sub> H <sub>14</sub> O <sub>6</sub>   | [M-H] <sup>-</sup>    | 289.0708 | -3.2 | 245.0797,205.0505,179.0338,137.0236 | Epicatechin                                              | l,n |
| P63 | 16.18 | C <sub>26</sub> H <sub>32</sub> O <sub>13</sub>  | [M-H] <sup>-</sup>    | 551.1777 | 1.2  | 165.0545                            | Glehlinside C                                            | l   |
| P64 | 16.29 | C <sub>22</sub> H <sub>20</sub> O <sub>12</sub>  | [M+HCOO] <sup>-</sup> | 521.0972 | 6.7  | 299.0555,284.0348                   | Takakin-8-glucuronide                                    | j   |
| P65 | 16.32 | C <sub>12</sub> H <sub>13</sub> NO <sub>5</sub>  | [M-H] <sup>-</sup>    | 250.0724 | 1.3  | 164.0705                            | 5-Acetamido-2-(2-carboxyethyl) benzoic acid              | h   |
| P66 | 16.47 | C <sub>9</sub> H <sub>10</sub> O <sub>3</sub>    | [M-H] <sup>-</sup>    | 165.0553 | -2.5 | 147.0438                            | 1-(4-Hydroxy-2-methoxyphenyl)ethanone                    | m   |
| P67 | 16.51 | C <sub>27</sub> H <sub>30</sub> O <sub>15</sub>  | [M-H] <sup>-</sup>    | 593.1524 | 2.0  | 285.0425                            | Kaempferol-3-O-rutinoside                                | j   |
| P68 | 16.60 | C <sub>16</sub> H <sub>16</sub> O <sub>8</sub>   | [M-H] <sup>-</sup>    | 335.0764 | -2.6 | 179.0335,135.0436                   | 4-O-Caffeoylshikimic Acid                                | n   |
| P69 | 16.69 | C <sub>32</sub> H <sub>42</sub> O <sub>16</sub>  | [M+HCOO] <sup>-</sup> | 727.2476 | 2.9  | 519.1876,339.1218                   | Dehydrodiconiferyl alcohol 4,γ'-di-O-β-D-glucopyranoside | c   |
| P70 | 16.73 | C <sub>17</sub> H <sub>20</sub> O <sub>9</sub>   | [M-H] <sup>-</sup>    | 367.1038 | 0.9  | 173.0454                            | 5-O-feruloylquinic acid                                  | c   |
| P71 | 17.12 | C <sub>17</sub> H <sub>24</sub> O <sub>10</sub>  | [M+HCOO] <sup>-</sup> | 433.1321 | -7.0 | 355.1008,175.0394                   | Geniposide                                               | c   |
| P72 | 17.73 | C <sub>15</sub> H <sub>16</sub> O <sub>9</sub>   | [M-H] <sup>-</sup>    | 339.0721 | -0.1 | 193.0130                            | Smiglanin                                                | n   |
| P73 | 17.93 | C <sub>21</sub> H <sub>20</sub> O <sub>11</sub>  | [M-H] <sup>-</sup>    | 447.0959 | 5.9  | 285.0423                            | Kaempferol 3-O-glucoside                                 | j   |
| P74 | 17.93 | C <sub>33</sub> H <sub>44</sub> O <sub>17</sub>  | [M-H] <sup>-</sup>    | 711.2501 | -0.7 | 549.1968,387.1438                   | Mediresinol Di-O-β-D-glucopyranoside                     | c   |
| P75 | 18.18 | C <sub>21</sub> H <sub>20</sub> O <sub>11</sub>  | [M-H] <sup>-</sup>    | 447.0947 | 3.1  | 357.0600                            | Luteolin-6-C-glucoside                                   | i   |
| P76 | 18.21 | C <sub>28</sub> H <sub>38</sub> O <sub>13</sub>  | [M-H] <sup>-</sup>    | 581.2233 | -1.1 | 419.1697,404.1474,401.1606          | Lyoniresin-4-yl-β-D-glucopyranoside                      | l   |
| P77 | 18.60 | C <sub>11</sub> H <sub>12</sub> O <sub>5</sub>   | [M-H] <sup>-</sup>    | 223.0613 | 0.5  | 193.0130,149.0220,135.0420,121.0291 | Sinapic acid                                             | g   |
| P78 | 18.61 | C <sub>34</sub> H <sub>46</sub> O <sub>18</sub>  | [M+HCOO] <sup>-</sup> | 787.2677 | 1.4  | 579.2079,417.1544                   | Liriodendrin                                             | c   |
| P79 | 18.82 | C <sub>7</sub> H <sub>6</sub> O <sub>3</sub>     | [M-H] <sup>-</sup>    | 137.0236 | -6.1 | 121.0290                            | 4-Hydroxybenzoic acid                                    | m,e |
| P80 | 18.98 | C <sub>21</sub> H <sub>20</sub> O <sub>10</sub>  | [M-H] <sup>-</sup>    | 431.1003 | 4.4  | 178.0266                            | Scutellarein-7-O-rhamnoside                              | j   |
| P81 | 19.15 | C <sub>25</sub> H <sub>41</sub> NO <sub>6</sub>  | [M+H] <sup>+</sup>    | 452.3027 | 4.5  | 363.2038,265.1697                   | Chasmanine                                               | a,b |
| P82 | 19.63 | C <sub>16</sub> H <sub>12</sub> O <sub>5</sub>   | [M-H] <sup>-</sup>    | 283.0597 | -5.1 | 268.0364                            | Calycosin                                                | d,m |
| P83 | 19.78 | C <sub>20</sub> H <sub>24</sub> O <sub>6</sub>   | [M-H] <sup>-</sup>    | 359.1498 | -0.6 | 297.0784,109.0291                   | Isolariciresinol                                         | f   |
| P84 | 19.89 | C <sub>22</sub> H <sub>22</sub> O <sub>10</sub>  | [M+HCOO] <sup>-</sup> | 491.1192 | -0.5 | 445.1248,283.0597,268.0363          | Calycosin-7-O-β-D-glucoside                              | d   |
| P85 | 19.98 | C <sub>24</sub> H <sub>39</sub> NO <sub>7</sub>  | [M+H] <sup>+</sup>    | 454.2767 | -7.2 | 364.1545,336.1594                   | Fuziline                                                 | a,b |
| P86 | 20.17 | C <sub>34</sub> H <sub>47</sub> NO <sub>11</sub> | [M+H] <sup>+</sup>    | 646.3237 | 2.3  | 599.2765,495.2221,369.1753          | Aconitine                                                | a,b |
| P87 | 20.21 | C <sub>29</sub> H <sub>40</sub> O <sub>9</sub>   | [M+HCOO] <sup>-</sup> | 577.2604 | -8.8 | 167.0342                            | 12-O-vanilloyl-sarcostin                                 | m   |

|      |       |                                                 |                       |          |      |                                                  |                                                             |           |
|------|-------|-------------------------------------------------|-----------------------|----------|------|--------------------------------------------------|-------------------------------------------------------------|-----------|
| P88  | 20.29 | C <sub>27</sub> H <sub>30</sub> O <sub>16</sub> | [M-H] <sup>-</sup>    | 609.1471 | 1.5  | 301.0313,273.0421,255.0306,15<br>1.0011          | Rutin                                                       | c,d,j,h   |
| P89  | 20.32 | C <sub>21</sub> H <sub>20</sub> O <sub>10</sub> | [M-H] <sup>-</sup>    | 431.1003 | 4.4  | 283.0600                                         | Isovitexin                                                  | i         |
| P90  | 20.47 | C <sub>28</sub> H <sub>38</sub> O <sub>13</sub> | [M-H] <sup>-</sup>    | 581.2233 | -1.2 | 389.1581                                         | Lyoni-resinol-3 $\alpha$ -O- $\beta$ -D-<br>glucopyranoside | e         |
| P91  | 20.54 | C <sub>20</sub> H <sub>18</sub> O <sub>11</sub> | [M-H] <sup>-</sup>    | 433.0814 | 8.7  | 300.0275                                         | Quercetin 3-O-beta-D-<br>xylopyranoside                     | c         |
| P92  | 20.56 | C <sub>28</sub> H <sub>32</sub> O <sub>14</sub> | [M-H] <sup>-</sup>    | 591.1728 | 1.4  | 459.1159,339.0732                                | Linarin                                                     | f         |
| P93  | 20.60 | C <sub>21</sub> H <sub>20</sub> O <sub>12</sub> | [M-H] <sup>-</sup>    | 463.0893 | 2.5  | 300.0283                                         | Quercetin-7-O- $\beta$ -D-<br>glucopyranoside               | j         |
| P94  | 20.69 | C <sub>21</sub> H <sub>22</sub> O <sub>11</sub> | [M-H] <sup>-</sup>    | 449.1100 | -0.4 | 303.0504,285.0384,178.9953,15<br>1.0011          | Astilbin                                                    | n         |
| P95  | 20.71 | C <sub>40</sub> H <sub>42</sub> O <sub>18</sub> | [M+HCOO] <sup>-</sup> | 855.2383 | 3.4  | 217.0497                                         | Smilaside G                                                 | n         |
| P96  | 20.82 | C <sub>22</sub> H <sub>22</sub> O <sub>11</sub> | [M-H] <sup>-</sup>    | 461.1126 | 7.9  | 179.0350,135.0441                                | 2-O-Cinnamoyl glucogallin                                   | j         |
| P97  | 20.94 | C <sub>15</sub> H <sub>10</sub> O <sub>6</sub>  | [M-H] <sup>-</sup>    | 285.0395 | -3.3 | 267.0255,257.0416,151.0011,13<br>3.0286          | Luteolin                                                    | j,n,f,g   |
| P98  | 21.03 | C <sub>33</sub> H <sub>40</sub> O <sub>19</sub> | [M-H] <sup>-</sup>    | 739.2104 | 1.8  | 693.2061,499.1518                                | Clitorin                                                    | j         |
| P99  | 21.05 | C <sub>25</sub> H <sub>24</sub> O <sub>12</sub> | [M-H] <sup>-</sup>    | 515.1215 | 3.9  | 191.0545,179.0363,137.0241                       | 4,5-Dicaffeoylquinic acid                                   | j         |
| P100 | 21.08 | C <sub>22</sub> H <sub>22</sub> O <sub>11</sub> | [M-H] <sup>-</sup>    | 461.1126 | 7.9  | 284.0327                                         | 5-Hydroxy-calycosin-7-O- $\beta$ -<br>D-glucoside           | d         |
| P101 | 21.16 | C <sub>15</sub> H <sub>12</sub> O <sub>7</sub>  | [M-H] <sup>-</sup>    | 303.0501 | -3.1 | 285.0392                                         | Taxifolin                                                   | n         |
| P102 | 21.59 | C <sub>26</sub> H <sub>32</sub> O <sub>11</sub> | [M-H] <sup>-</sup>    | 519.1865 | -1.4 | 357.1311                                         | Pinoresinol- $\beta$ -D-glucoside                           | c         |
| P103 | 21.75 | C <sub>25</sub> H <sub>39</sub> NO <sub>7</sub> | [M+H] <sup>+</sup>    | 466.2805 | 1.3  | 379.2333,281.1762,173.1414                       | Delbruine                                                   | a         |
| P104 | 21.75 | C <sub>25</sub> H <sub>24</sub> O <sub>12</sub> | [M-H] <sup>-</sup>    | 515.1203 | 1.6  | 191.0539,179.0349,173.0452,13<br>5.0437          | 3,4-Dicaffeoylquinic acid                                   | j         |
| P105 | 21.78 | C <sub>26</sub> H <sub>32</sub> O <sub>11</sub> | [M-H] <sup>-</sup>    | 519.1866 | -1.2 | 357.1317,151.0381,113.0242                       | 6'-O-beta-D-<br>Glucosylswertiamarine                       | i         |
| P106 | 21.78 | C <sub>35</sub> H <sub>49</sub> NO <sub>9</sub> | [M+H] <sup>+</sup>    | 628.3465 | -2.5 | 563.2879,491.2502,197.1402                       | Vilmorrianine C                                             | a         |
| P107 | 21.84 | C <sub>21</sub> H <sub>20</sub> O <sub>7</sub>  | [M+HCOO] <sup>-</sup> | 429.1203 | 2.9  | 119.0454                                         | 1,2-O-di-p-Coumaroylglycerol                                | n         |
| P108 | 21.85 | C <sub>27</sub> H <sub>28</sub> O <sub>14</sub> | [M-H] <sup>-</sup>    | 575.1435 | 5.0  | 267.0658                                         | Rhamnosyl-glucosyl-apigenin                                 | e         |
| P109 | 21.89 | C <sub>22</sub> H <sub>26</sub> O <sub>8</sub>  | [M-H] <sup>-</sup>    | 417.1550 | -1.1 | 181.0488,166.0256                                | Syringaresinol                                              | i,n       |
| P110 | 21.95 | C <sub>25</sub> H <sub>24</sub> O <sub>12</sub> | [M-H] <sup>-</sup>    | 515.1208 | 2.6  | 353.0872,135.0442                                | 1,5-Dicaffeoylquinic acid                                   | j         |
| P111 | 22.02 | C <sub>15</sub> H <sub>10</sub> O <sub>6</sub>  | [M-H] <sup>-</sup>    | 285.0407 | 0.8  | 257.0470,229.0501,169.0141,15<br>1.0019          | Kaempferol                                                  | c,j,e,i,g |
| P112 | 22.06 | C <sub>16</sub> H <sub>14</sub> O <sub>6</sub>  | [M-H] <sup>-</sup>    | 301.0728 | 3.4  | 283.0604,268.0387,259.0606,24<br>1.0504,151.0382 | Baishouwuhenzophenone                                       | m         |
| P113 | 22.18 | C <sub>47</sub> H <sub>50</sub> O <sub>22</sub> | [M-H] <sup>-</sup>    | 965.2711 | -1.0 | 279.0164,189.0570                                | Smiglaside D                                                | n         |
| P114 | 22.33 | C <sub>27</sub> H <sub>30</sub> O <sub>14</sub> | [M-H] <sup>-</sup>    | 577.1575 | 2.2  | 459.1163,313.0719                                | Rhoifolin                                                   | e         |
| P115 | 22.33 | C <sub>21</sub> H <sub>20</sub> O <sub>11</sub> | [M-H] <sup>-</sup>    | 447.0933 | 0.1  | 300.0267,255.0302                                | Quercitrin                                                  | c,j,e,h   |
| P116 | 22.36 | C <sub>16</sub> H <sub>14</sub> O <sub>6</sub>  | [M-H] <sup>-</sup>    | 301.0722 | 1.4  | 255.0302,241.0512                                | Hesperitin                                                  | g         |

|      |       |                                                  |                       |           |      |                                     |                                                         |           |
|------|-------|--------------------------------------------------|-----------------------|-----------|------|-------------------------------------|---------------------------------------------------------|-----------|
| P117 | 22.77 | C <sub>18</sub> H <sub>24</sub> O <sub>12</sub>  | [M+HCOO] <sup>-</sup> | 477.1283  | 6.9  | 251.0570                            | Asperulosidic acid                                      | c         |
| P118 | 22.97 | C <sub>31</sub> H <sub>43</sub> NO <sub>10</sub> | [M+HCOO] <sup>-</sup> | 634.2873  | 0.7  | 515.1875,395.1612,229.0503          | Benzoylmesaconine                                       | a         |
| P119 | 23.21 | C <sub>16</sub> H <sub>12</sub> O <sub>6</sub>   | [M-H] <sup>-</sup>    | 299.0561  | 0.0  | 151.0021                            | Chrysoeriol                                             | g         |
| P120 | 23.32 | C <sub>51</sub> H <sub>84</sub> O <sub>23</sub>  | [M+H] <sup>+</sup>    | 1065.5419 | -5.4 | 979.5174,912.4721,693.3352          | Protogracillin                                          | k         |
| P121 | 23.34 | C <sub>21</sub> H <sub>18</sub> O <sub>11</sub>  | [M-H] <sup>-</sup>    | 445.0816  | 9.0  | 269.0449,223.0592,195.0629          | Baicalin                                                | d,j       |
| P122 | 23.44 | C <sub>27</sub> H <sub>30</sub> O <sub>14</sub>  | [M+HCOO] <sup>-</sup> | 623.1659  | 6.7  | 577.1571,431.0995                   | Kaempferitrin                                           | e         |
| P123 | 23.47 | C <sub>21</sub> H <sub>20</sub> O <sub>10</sub>  | [M-H] <sup>-</sup>    | 431.0983  | -0.2 | 285.0397                            | Afzelin                                                 | h         |
| P124 | 23.64 | C <sub>21</sub> H <sub>22</sub> O <sub>10</sub>  | [M-H] <sup>-</sup>    | 433.1136  | -1.0 | 269.0434,259.0604,178.9966          | Isoengeletin                                            | n         |
| P125 | 23.70 | C <sub>24</sub> H <sub>24</sub> O <sub>11</sub>  | [M+HCOO] <sup>-</sup> | 533.1319  | 3.4  | 283.0608                            | 3'-Acetyl-calycosin-7-O-β-D-glucoside                   | d         |
| P126 | 23.88 | C <sub>21</sub> H <sub>22</sub> O <sub>12</sub>  | [M-H] <sup>-</sup>    | 465.1015  | -5.1 | 341.0693,313.0928,209.0450          | Taxifolin-3-glucoside                                   | n         |
| P127 | 23.88 | C <sub>26</sub> H <sub>41</sub> NO <sub>7</sub>  | [M+H] <sup>+</sup>    | 480.2929  | -5.6 | 393.2121,349.1867                   | 14-Acetylneoline                                        | a         |
| P128 | 23.88 | C <sub>20</sub> H <sub>20</sub> O <sub>7</sub>   | [M+HCOO] <sup>-</sup> | 417.1196  | 1.2  | 325.0746,181.0497,177.0183          | Tangeretin                                              | f         |
| P129 | 23.90 | C <sub>22</sub> H <sub>22</sub> O <sub>9</sub>   | [M+HCOO] <sup>-</sup> | 475.1248  | 0.4  | 267.0647,252.0424                   | Formononetin-7-O-β-D-glucoside                          | d         |
| P130 | 23.92 | C <sub>24</sub> H <sub>20</sub> O <sub>9</sub>   | [M-H] <sup>-</sup>    | 451.1033  | -0.2 | 341.0717                            | Cinchonain                                              | n         |
| P131 | 23.93 | C <sub>16</sub> H <sub>14</sub> O <sub>5</sub>   | [M+HCOO] <sup>-</sup> | 331.0827  | 1.0  | 271.0604                            | Sakuranetin                                             | n         |
| P132 | 23.99 | C <sub>33</sub> H <sub>26</sub> O <sub>12</sub>  | [M-H] <sup>-</sup>    | 613.1388  | 6.0  | 189.0172                            | Cinchonain caffeate                                     | n         |
| P133 | 24.13 | C <sub>10</sub> H <sub>10</sub> O <sub>4</sub>   | [M-H] <sup>-</sup>    | 193.0496  | -5.4 | 179.0566,149.0564,135.0440          | Ferulic acid                                            | m,d,e,n,g |
| P134 | 24.13 | C <sub>45</sub> H <sub>72</sub> O <sub>16</sub>  | [M+H] <sup>+</sup>    | 869.4848  | -5.1 | 821.4331,737.3733,591.3396,269.0879 | Dioscin                                                 | k         |
| P135 | 24.20 | C <sub>9</sub> H <sub>8</sub> O <sub>3</sub>     | [M+HCOO] <sup>-</sup> | 209.0442  | -6.3 | 147.0445,107.0499                   | 2-Coumaric acid                                         | j         |
| P136 | 24.49 | C <sub>29</sub> H <sub>38</sub> O <sub>15</sub>  | [M-H] <sup>-</sup>    | 625.2132  | -0.9 | 286.0936                            | Isomucronulatol-7,2'-di-O-glucoside                     | d         |
| P137 | 24.50 | C <sub>26</sub> H <sub>26</sub> O <sub>10</sub>  | [M+HCOO] <sup>-</sup> | 543.1542  | 6.2  | 289.0715                            | Hydrogenated smiglabrone A                              | n         |
| P138 | 24.58 | C <sub>29</sub> H <sub>37</sub> NO <sub>5</sub>  | [M+H] <sup>+</sup>    | 480.2791  | 9.8  | 417.2440,209.1416                   | Cytochalasin B                                          | a         |
| P139 | 24.70 | C <sub>26</sub> H <sub>44</sub> O <sub>9</sub>   | [M+HCOO] <sup>-</sup> | 545.2951  | -3.0 | 337.2378                            | 2-Deoxy-1,3,4,6-tetra-O-pivaloyl-glucopyranose          | j         |
| P140 | 24.75 | C <sub>58</sub> H <sub>86</sub> O <sub>19</sub>  | [M+H] <sup>+</sup>    | 1087.5738 | -9.0 | 1019.5758,739.3743                  | Wilfoside K1N                                           | m         |
| P141 | 24.76 | C <sub>22</sub> H <sub>24</sub> O <sub>10</sub>  | [M+HCOO] <sup>-</sup> | 493.1367  | 3.1  | 178.9963                            | 10-Demethyl-9,10-dimethoxypterocarpan-3-O-β-D-glucoside | d         |
| P142 | 24.81 | C <sub>15</sub> H <sub>12</sub> O <sub>4</sub>   | [M-H] <sup>-</sup>    | 255.0646  | -6.7 | 135.0077,109.0286                   | Liquiritigenin                                          | f         |
| P143 | 24.92 | C <sub>23</sub> H <sub>28</sub> O <sub>10</sub>  | [M-H] <sup>-</sup>    | 463.1613  | 0.6  | 301.1057,271.0606                   | Isomucronulatol-7-O-β-D-glucoside                       | d         |
| P144 | 25.06 | C <sub>16</sub> H <sub>12</sub> O <sub>4</sub>   | [M-H] <sup>-</sup>    | 267.0663  | -0.1 | 252.0448                            | Formononetin                                            | d,f       |
| P145 | 25.17 | C <sub>15</sub> H <sub>10</sub> O <sub>7</sub>   | [M-H] <sup>-</sup>    | 301.0356  | 0.7  | 199.0376,178.9972,151.0024          | Quercetin                                               | j,i,n,f   |
| P146 | 25.24 | C <sub>82</sub> H <sub>134</sub> O <sub>43</sub> | [M+HCOO] <sup>-</sup> | 1851.8357 | 4.1  | 469.1554                            | Clematichinenoside AR                                   | f         |

|      |       |                                                  |                       |           |      |                                              |                                         |     |
|------|-------|--------------------------------------------------|-----------------------|-----------|------|----------------------------------------------|-----------------------------------------|-----|
| P147 | 25.31 | C <sub>29</sub> H <sub>39</sub> NO <sub>6</sub>  | [M+H] <sup>+</sup>    | 498.2849  | -0.3 | 305.2345,293.1355,201.0556                   | Delavaconitine                          | a   |
| P148 | 25.32 | C <sub>21</sub> H <sub>20</sub> O <sub>10</sub>  | [M-H] <sup>-</sup>    | 431.0998  | 3.4  | 269.0458                                     | 4'-Demethylcalycosin-7-O-β-D-glucoside  | d   |
| P149 | 25.34 | C <sub>47</sub> H <sub>78</sub> O <sub>19</sub>  | [M+HCOO] <sup>-</sup> | 991.5108  | -1.1 | 945.5071                                     | Astragaloside VI                        | d   |
| P150 | 25.35 | C <sub>76</sub> H <sub>124</sub> O <sub>39</sub> | [M+HCOO] <sup>-</sup> | 1705.7765 | 3.7  | 1689.7808,1189.6034                          | Clematiunicinoside E                    | f   |
| P151 | 25.44 | C <sub>28</sub> H <sub>42</sub> O <sub>7</sub>   | [M+H] <sup>+</sup>    | 491.3013  | 1.9  | 103.0747                                     | Caudatin                                | m   |
| P152 | 25.47 | C <sub>70</sub> H <sub>114</sub> O <sub>34</sub> | [M+HCOO] <sup>-</sup> | 1543.7212 | 2.5  | 865.4920,733.4459                            | Clematichinenoside C                    | f   |
| P153 | 25.52 | C <sub>28</sub> H <sub>36</sub> O <sub>8</sub>   | [M-H] <sup>-</sup>    | 499.2327  | -2.1 | 361.1530,343.2103,325.1977,283.0566,259.0606 | Qingyangshengenin                       | m   |
| P154 | 25.55 | C <sub>23</sub> H <sub>37</sub> NO <sub>6</sub>  | [M+H] <sup>+</sup>    | 424.2697  | 0.7  | 335.2247,247.1209                            | Senbusine A                             | a,b |
| P155 | 25.55 | C <sub>36</sub> H <sub>42</sub> O <sub>19</sub>  | [M-H] <sup>-</sup>    | 777.2280  | 4.2  | 735.2130,481.1231                            | Smilaside A                             | n   |
| P156 | 25.67 | C <sub>28</sub> H <sub>36</sub> O <sub>7</sub>   | [M-H] <sup>-</sup>    | 483.2368  | -4.2 | 121.0293                                     | 12-O-benzoyl-deacymetaplexigenin        | m   |
| P157 | 25.81 | C <sub>92</sub> H <sub>142</sub> O <sub>46</sub> | [M-H] <sup>-</sup>    | 1981.8740 | 2.1  | 990.4320,469.1560                            | Clematomandshurica saponin B            | f   |
| P158 | 25.85 | C <sub>59</sub> H <sub>96</sub> O <sub>26</sub>  | [M+HCOO] <sup>-</sup> | 1265.6161 | -0.8 | 749.4457,469.1560                            | Herderacoside C                         | f   |
| P159 | 25.91 | C <sub>86</sub> H <sub>132</sub> O <sub>42</sub> | [M-H] <sup>-</sup>    | 1835.8137 | 0.9  | 733.4488                                     | Clematochinenoside F                    | f   |
| P160 | 25.95 | C <sub>64</sub> H <sub>104</sub> O <sub>29</sub> | [M+HCOO] <sup>-</sup> | 1381.6670 | 1.8  | 865.4954,733.4488                            | Huzhangoside B                          | f   |
| P161 | 25.98 | C <sub>51</sub> H <sub>82</sub> O <sub>21</sub>  | [M+HCOO] <sup>-</sup> | 1075.5353 | 2.1  | 1029.5296,987.5175                           | Agroastragaloside I                     | d   |
| P162 | 26.01 | C <sub>35</sub> H <sub>42</sub> O <sub>21</sub>  | [M-H] <sup>-</sup>    | 797.2179  | 4.2  | 755.2088,593.1550,451.1275                   | Rindoside                               | i   |
| P163 | 26.02 | C <sub>49</sub> H <sub>80</sub> O <sub>20</sub>  | [M+HCOO] <sup>-</sup> | 1033.5243 | 1.7  | 987.5175,927.4967                            | Agroastragaloside III                   | d   |
| P164 | 26.14 | C <sub>15</sub> H <sub>12</sub> O <sub>5</sub>   | [M-H] <sup>-</sup>    | 271.0599  | -4.9 | 151.0011,119.0503,107.0137                   | Naringenin                              | f,n |
| P165 | 26.25 | C <sub>41</sub> H <sub>66</sub> O <sub>15</sub>  | [M+HCOO] <sup>-</sup> | 843.4371  | -1.5 | 761.4067,743.4058                            | Cynsaccatol C                           | m   |
| P166 | 26.29 | C <sub>41</sub> H <sub>64</sub> O <sub>13</sub>  | [M+HCOO] <sup>-</sup> | 809.4322  | -0.8 | 635.3401                                     | Wallicoside D                           | m   |
| P167 | 26.59 | C <sub>17</sub> H <sub>16</sub> O <sub>6</sub>   | [M-H] <sup>-</sup>    | 315.0865  | -2.9 | 109.0298                                     | 2,3-Dihydroxy-9,10-dimethoxypterocarpan | d   |
| P168 | 26.67 | C <sub>43</sub> H <sub>70</sub> O <sub>15</sub>  | [M+HCOO] <sup>-</sup> | 871.4663  | -3.8 | 765.4362                                     | Astragaloside II                        | d   |
| P169 | 26.80 | C <sub>49</sub> H <sub>76</sub> O <sub>20</sub>  | [M-H] <sup>-</sup>    | 983.4848  | -0.9 | 113.0244                                     | Achyranthoside C dimethyl ester         | e   |
| P170 | 26.83 | C <sub>41</sub> H <sub>68</sub> O <sub>14</sub>  | [M+HCOO] <sup>-</sup> | 829.4554  | 0.2  | 783.4509,621.4067,489.3512,329.2288          | Astragaloside A                         | d   |
| P171 | 26.87 | C <sub>18</sub> H <sub>34</sub> O <sub>5</sub>   | [M-H] <sup>-</sup>    | 329.2322  | -3.6 | 293.2114                                     | Pinellie acid                           | e   |
| P172 | 26.97 | C <sub>38</sub> H <sub>44</sub> O <sub>20</sub>  | [M-H] <sup>-</sup>    | 819.2376  | 2.7  | 583.1594,559.1649,513.1378                   | Smiglaside C                            | n   |
| P173 | 27.02 | C <sub>47</sub> H <sub>74</sub> O <sub>18</sub>  | [M+HCOO] <sup>-</sup> | 971.4869  | 1.2  | 925.4781                                     | Pseudoginsenoside RT1                   | e   |
| P174 | 27.31 | C <sub>56</sub> H <sub>84</sub> O <sub>20</sub>  | [M+HCOO] <sup>-</sup> | 1121.5454 | -7.5 | 137.0253                                     | Otophyllsode O                          | m   |
| P175 | 27.37 | C <sub>42</sub> H <sub>68</sub> O <sub>15</sub>  | [M+HCOO] <sup>-</sup> | 857.4526  | -1.7 | 775.4244,757.4132,739.4021                   | Cynawilfoside E                         | m   |
| P176 | 27.63 | C <sub>49</sub> H <sub>72</sub> O <sub>17</sub>  | [M-H] <sup>-</sup>    | 931.4647  | -5.4 | 343.2115                                     | Cynanchin C                             | m   |
| P177 | 27.69 | C <sub>47</sub> H <sub>74</sub> O <sub>17</sub>  | [M+HCOO] <sup>-</sup> | 955.4916  | 0.8  | 867.4757                                     | Acetytastragaloside                     | d   |

|      |       |                                                  |                       |           |      |                                                  |                                         |             |
|------|-------|--------------------------------------------------|-----------------------|-----------|------|--------------------------------------------------|-----------------------------------------|-------------|
| P178 | 27.74 | C <sub>48</sub> H <sub>78</sub> O <sub>18</sub>  | [M+HCOO] <sup>-</sup> | 987.5203  | 3.4  | 941.5137                                         | Soyasaponin I methyl ester              | d           |
| P179 | 27.84 | C <sub>64</sub> H <sub>104</sub> O <sub>30</sub> | [M-H] <sup>-</sup>    | 1351.6560 | 1.5  | 979.4596,779.4289                                | Huzhangoside D                          | f           |
| P180 | 27.85 | C <sub>40</sub> H <sub>46</sub> O <sub>21</sub>  | [M-H] <sup>-</sup>    | 861.2507  | 5.6  | 583.1612                                         | Acetylated smiglaside C                 | n           |
| P181 | 27.98 | C <sub>22</sub> H <sub>29</sub> NO <sub>3</sub>  | [M+H] <sup>+</sup>    | 356.2211  | -2.7 | 295.1349,265.1071                                | Songoramine                             | a           |
| P182 | 28.12 | C <sub>43</sub> H <sub>70</sub> O <sub>15</sub>  | [M+HCOO] <sup>-</sup> | 871.4696  | -0.1 | 765.4387                                         | Isoastragaloside II                     | d           |
| P183 | 28.44 | C <sub>47</sub> H <sub>70</sub> O <sub>20</sub>  | [M-H] <sup>-</sup>    | 953.4467  | 8.3  | 793.4337                                         | Achyranthoside B                        | e           |
| P184 | 28.56 | C <sub>48</sub> H <sub>76</sub> O <sub>18</sub>  | [M+HCOO] <sup>-</sup> | 985.5083  | 7.1  | 615.3835,455.3538                                | Momordin IIa                            | e           |
| P185 | 28.74 | C <sub>42</sub> H <sub>60</sub> O <sub>14</sub>  | [M-H] <sup>-</sup>    | 787.3956  | 5.9  | 137.0239                                         | Cynanauriculoside C                     | m           |
| P186 | 28.79 | C <sub>48</sub> H <sub>70</sub> O <sub>17</sub>  | [M-H] <sup>-</sup>    | 917.4597  | 6.2  | 137.0239                                         | Wallicoside H                           | m           |
| P187 | 29.09 | C <sub>45</sub> H <sub>72</sub> O <sub>16</sub>  | [M+HCOO] <sup>-</sup> | 913.4808  | 0.6  | 867.4766,825.4636,765.4450                       | Astragaloside I                         | d           |
| P188 | 29.22 | C <sub>30</sub> H <sub>46</sub> O <sub>5</sub>   | [M-H] <sup>-</sup>    | 485.3256  | -3.4 | 441.3325,365.2860                                | Quillaic acid                           | e           |
| P189 | 29.46 | C <sub>41</sub> H <sub>64</sub> O <sub>13</sub>  | [M-H] <sup>-</sup>    | 763.4247  | -3.5 | 763.4270                                         | Tarasaponin VI                          | e           |
| P190 | 30.20 | C <sub>18</sub> H <sub>34</sub> O <sub>4</sub>   | [M-H] <sup>-</sup>    | 313.2376  | -2.8 | 295.2270,183.1389                                | 12DiHOME                                | k           |
| P191 | 30.51 | C <sub>30</sub> H <sub>46</sub> O <sub>6</sub>   | [M-H] <sup>-</sup>    | 501.3227  | 1.1  | 439.3175                                         | 26-Hydroxypticolic acid G               | e           |
| P192 | 31.31 | C <sub>17</sub> H <sub>34</sub> O <sub>2</sub>   | [M+HCOO] <sup>-</sup> | 315.2530  | -3.4 | 116.9280                                         | Margaric acid                           | e           |
| P193 | 32.70 | C <sub>28</sub> H <sub>46</sub> O <sub>7</sub>   | [M-H] <sup>-</sup>    | 493.3210  | 7.9  | 319.1944                                         | Makisterone B                           | e           |
| P194 | 33.25 | C <sub>32</sub> H <sub>45</sub> NO <sub>10</sub> | [M+H] <sup>+</sup>    | 604.3119  | 0.4  | 586.2984,572.2898,554.2755,54<br>0.2563,522.2509 | Benzoylaconine                          | a,b         |
| P195 | 33.71 | C <sub>18</sub> H <sub>30</sub> O <sub>3</sub>   | [M-H] <sup>-</sup>    | 293.2114  | -2.8 | 277.2169                                         | 13-Keto-9Z,11E-<br>octadecadienoic acid | e           |
| P196 | 34.67 | C <sub>18</sub> H <sub>32</sub> O <sub>3</sub>   | [M-H] <sup>-</sup>    | 295.2279  | 0.0  | 277.2168                                         | 13S-hydroxyoctadecadienoic<br>acid      | e           |
| P197 | 34.68 | C <sub>30</sub> H <sub>48</sub> O <sub>6</sub>   | [M-H] <sup>-</sup>    | 503.3393  | 3.0  | 485.327                                          | 23-Hydroxytormentic acid                | e           |
| P198 | 39.42 | C <sub>23</sub> H <sub>46</sub> O <sub>3</sub>   | [M+HCOO] <sup>-</sup> | 415.3429  | 0.1  | 369.3371                                         | 2-Hydroxytricosanoic acid               | c           |
| P199 | 39.46 | C <sub>16</sub> H <sub>32</sub> O <sub>3</sub>   | [M-H] <sup>-</sup>    | 271.2278  | -0.1 | 225.2224                                         | 16-Hydroxyhexadecanoic acid             | k           |
| P200 | 40.87 | C <sub>27</sub> H <sub>41</sub> NO <sub>3</sub>  | [M-H] <sup>-</sup>    | 426.3009  | -1.2 | 120.0897                                         | Peimisine                               | e           |
| P201 | 41.10 | C <sub>18</sub> H <sub>32</sub> O <sub>2</sub>   | [M-H] <sup>-</sup>    | 279.2319  | -3.7 | 261.2297,221.1546                                | Linoleic acid                           | a,j,k,e,n,g |
| P202 | 41.10 | C <sub>30</sub> H <sub>46</sub> O <sub>3</sub>   | [M-H] <sup>-</sup>    | 453.3403  | 6.4  | 353.2127,191.1074                                | Oleanonic acid                          | f           |
| P203 | 41.34 | C <sub>30</sub> H <sub>48</sub> O <sub>4</sub>   | [M-H] <sup>-</sup>    | 471.3473  | -1.5 | 409.3465                                         | Hederagenin                             | j,f         |
| P204 | 42.32 | C <sub>29</sub> H <sub>48</sub> O                | [M+HCOO] <sup>-</sup> | 457.3677  | -2.1 | 341.2882,125.0972                                | Stigmasterol                            | i,n,f       |
| P205 | 42.33 | C <sub>32</sub> H <sub>50</sub> O <sub>4</sub>   | [M-H] <sup>-</sup>    | 497.3653  | 3.4  | 483.3574                                         | Oleanolic acid 3-acetate                | m           |
| P206 | 42.36 | C <sub>30</sub> H <sub>48</sub> O <sub>3</sub>   | [M-H] <sup>-</sup>    | 455.3504  | -5.8 | 371.3302,179.1091,111.0811                       | Oleanolic acid                          | e,i,f       |
| P207 | 42.38 | C <sub>16</sub> H <sub>32</sub> O <sub>2</sub>   | [M-H] <sup>-</sup>    | 255.2321  | -3.2 | 227.2009,169.1242                                | Palmic acid                             | k           |
| P208 | 42.84 | C <sub>18</sub> H <sub>34</sub> O <sub>2</sub>   | [M-H] <sup>-</sup>    | 281.2477  | -3.0 | 241.2180                                         | Oleic acid                              | k,e,n,g     |

Notes: a. *Aconiti radix cocta* (Zhichuanwu, 制川乌); b. *Aconiti kusnezoffii radix cocta* (Zhicao Wu, 制草乌); c. *Eucommia ulmoides*

Oliv. (Yanduzhong, 盐杜仲); d. *Astragalus mongholicus* Bunge (Huangqi, 黄芪); e. *Achyranthes bidentata* Blume (Niuxi, 牛膝); f.

*Clematis chinensis* Osbeck (Weilingxian, 威灵仙); g. *Coix lacryma-jobi* L. (Yiyiren, 薏苡仁); h. *Houttuynia cordata* Thunb. (Yuxingcao, 鱼腥草); i. *Gentiana macrophylla* Pall. (Qinjiao, 秦艽); j. *Aster indicus* L. (Malancao, 马兰草); k. *Dioscorea septemloba* Thunb. (Mianbixie, 绵萆薢); l. *Sargentodoxa cuneata* (Oliv.) Rehder & E.H.Wilson (Daxueteng, 大血藤); m. *Cynanchum wilfordii* (Maxim.) Hook.f. (Geshanxiao, 隔山消); n. *Smilax glabra* Roxb. (Tufuling, 土茯苓)
