# Supplementary material
Source: Royal Society of Chemistry journal article supplement (doi:10.1039/d5ay02031j)

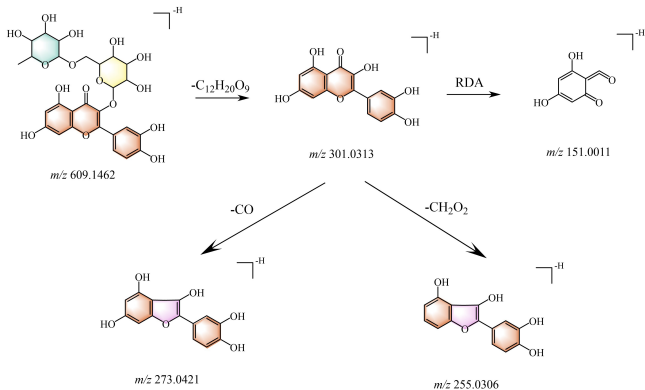

Supplement: d5ay02031j3.pdf [file d5ay02031j3.pdf]

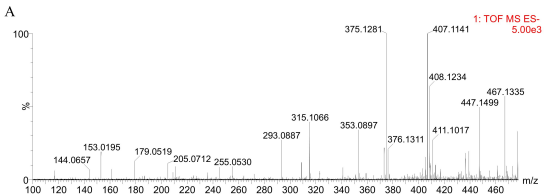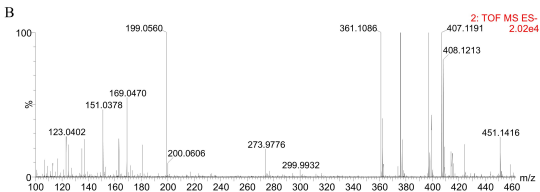

Supplement: d5ay02031j4.pdf [file d5ay02031j4.pdf]

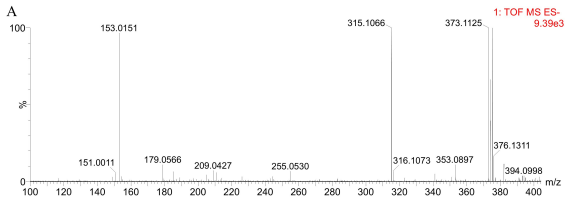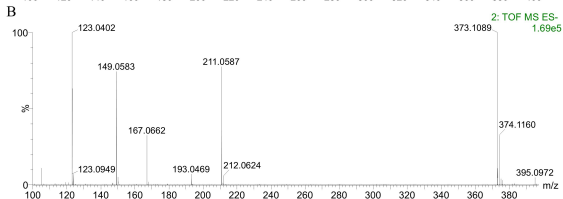

Supplement: d5ay02031j5.pdf [file d5ay02031j5.pdf]

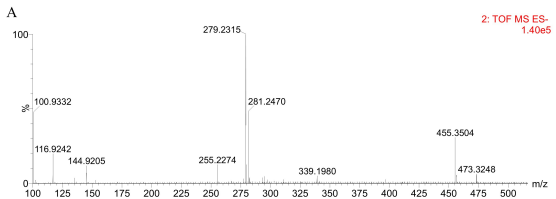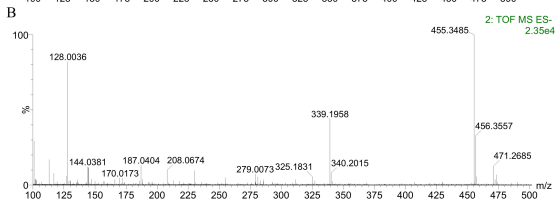

Supplement: d5ay02031j6.pdf [file d5ay02031j6.pdf]

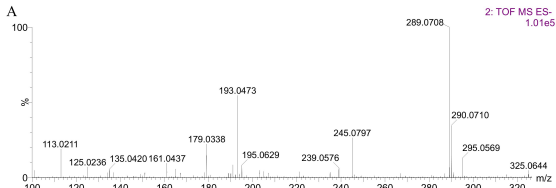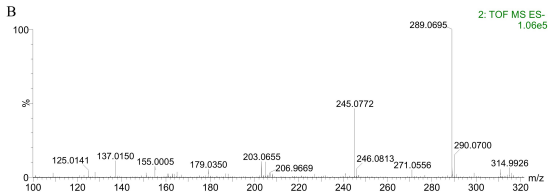

Supplement: d5ay02031j7.pdf [file d5ay02031j7.pdf]
